# Supplementary material for: A Human Development Framework for CO2 Reductions
Source: PubMed Central journal article supplement (PMC3244443; doi:10.1371/journal.pone.0029262), 2011-12-21
Supplement: pone.0029262.s009.pdf [file pone.0029262.s009.pdf]

| component | slope $h$       | corr. coeff. |
|-----------|-----------------|--------------|
| HDI       | $8.93 \pm 0.31$ | 0.91         |
| GDP       | $7.34 \pm 0.24$ | 0.92         |
| life exp. | $7.86 \pm 0.48$ | 0.78         |
| education | $7.87 \pm 0.41$ | 0.83         |
